# Supplementary material for: Long Noncoding RNA UCA1 Regulates PRL-3 Expression by Sponging MicroRNA-495 to Promote the Progression of Gastric Cancer
Source: PubMed Central journal article supplement (PMC6992896; doi:10.1016/j.omtn.2019.10.020), 2019-10-25
Supplement: mmc1.pdf [file mmc1.pdf]

OMTN, Volume 19

## **Supplemental Information**

### **Long Noncoding RNA UCA1 Regulates PRL-3 Expression by Sponging MicroRNA-495 to Promote the Progression of Gastric Cancer**

**Yi Cao, Jian-Bo Xiong, Guo-Yang Zhang, Yi Liu, Zhi-Gang Jie, and Zheng-Rong Li**

**Supplemental Figure 1.** UCA1 up-regulates PRL-3 expression to promote gastric cancer cell proliferation, invasion and metastasis by sponging miR-495, as reflected by inhibited Caspase 3 and enhanced Bcl-2 and MMP-2/7.

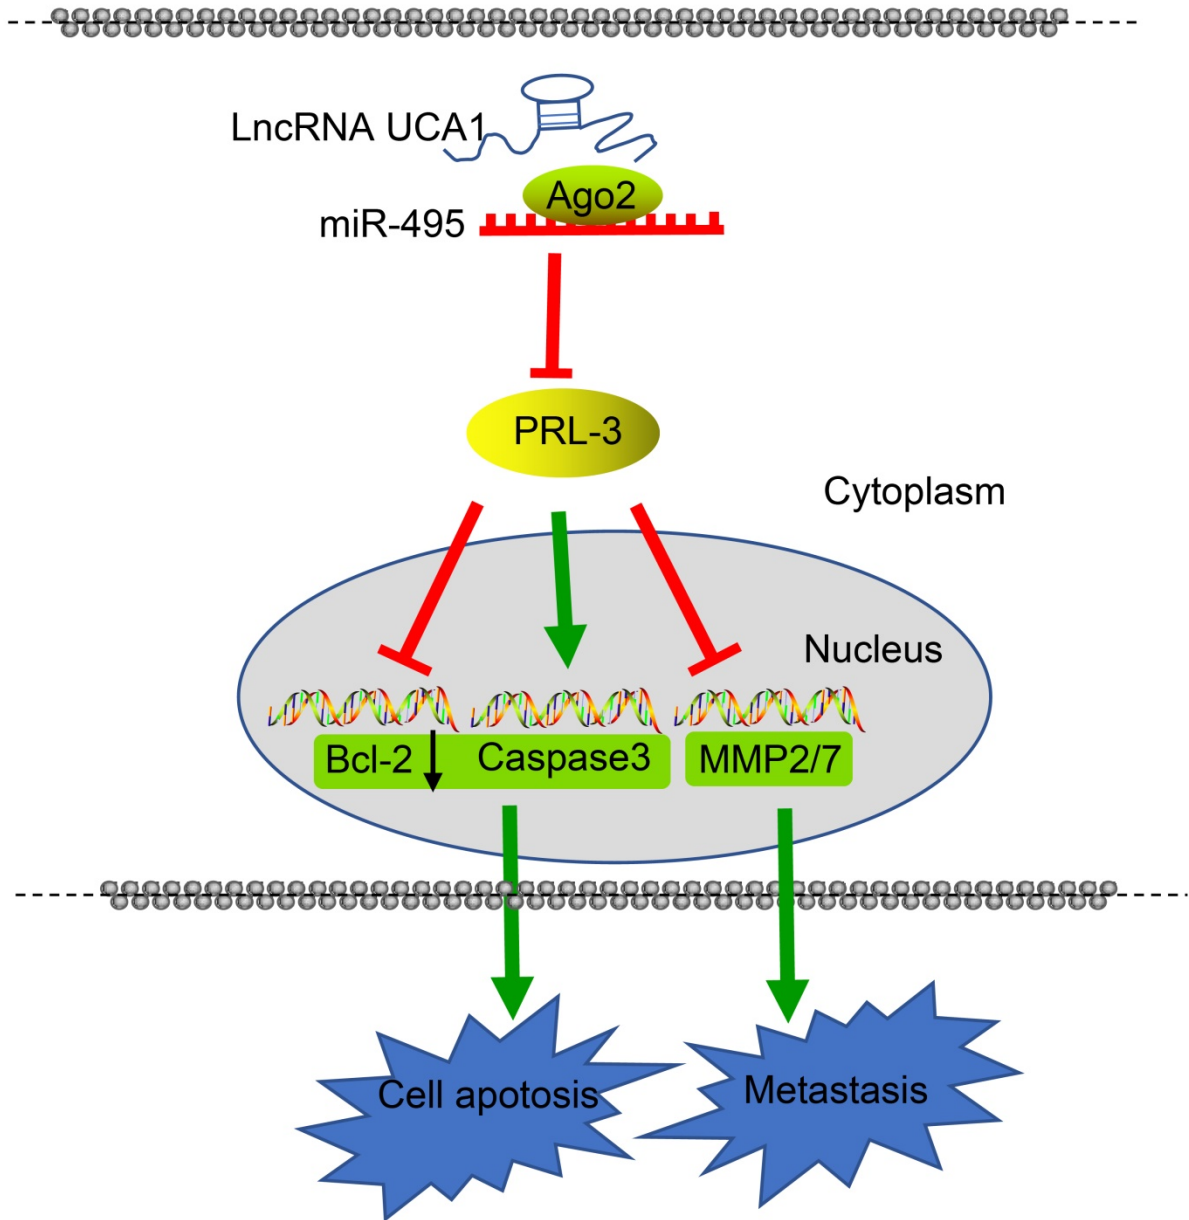

**Supplemental Figure 1.** UCA1 up-regulates PRL-3 expression to promote gastric cancer cell proliferation, invasion and metastasis by sponging miR-495, as reflected by inhibited Caspase 3 and enhanced Bcl-2 and MMP-2/7.

**Supplemental Table 1** The relationship between the level of UCA1 and the clinicopathological characteristics of GC patients

| Characteristics          | N (%)      | Average fold change $\pm$ SD | <i>p</i> |
|--------------------------|------------|------------------------------|----------|
| Gender                   |            |                              | 0.845    |
| Female                   | 23 (27.06) | 1.80 $\pm$ 0.23              |          |
| Male                     | 62 (72.94) | 1.79 $\pm$ 0.20              |          |
| Age (years)              |            |                              | 0.514    |
| < 50                     | 34 (40.00) | 1.81 $\pm$ 0.23              |          |
| $\geq$ 50                | 51 (60.00) | 1.78 $\pm$ 0.19              |          |
| Tumor site               |            |                              | 0.619    |
| Upper stomach            | 17 (20.00) | 1.75 $\pm$ 0.27              |          |
| Middle stomach           | 28 (32.94) | 1.79 $\pm$ 0.15              |          |
| Lower stomach            | 40 (47.06) | 1.81 $\pm$ 0.22              |          |
| Tumor size               |            |                              | 0.423    |
| < 5 cm                   | 58 (68.24) | 1.78 $\pm$ 0.14              |          |
| $\geq$ 5 cm              | 27 (31.76) | 1.82 $\pm$ 0.32              |          |
| Clinical stage           |            |                              | < 0.001  |
| I-II                     | 51(60.00)  | 1.68 $\pm$ 0.16              |          |
| IIIA                     | 34(40.00)  | 1.95 $\pm$ 0.17              |          |
| Lymph node metastasis    |            |                              | < 0.001  |
| N0-N1                    | 47 (55.29) | 1.70 $\pm$ 0.15              |          |
| N2-N3                    | 38 (44.71) | 1.90 $\pm$ 0.22              |          |
| Tumor infiltration depth |            |                              | < 0.001  |
| T1~T2                    | 37 (43.53) | 1.69 $\pm$ 0.18              |          |
| T3~T4                    | 48 (56.47) | 1.87 $\pm$ 0.20              |          |

Note: N, number; SD, standard deviation.

**Supplemental Table 2** The primer sequences for RT-qPCR

| Name     | Sequence (5'-3')                                                |
|----------|-----------------------------------------------------------------|
| UCA1     | CTCTCCATTGGGTTACCATTC<br>GCGGCAGGTCTTAAGAGATGAG                 |
| miR-495  | TCTACCGGTCGCCTCTGCTCAGTGTGAGCC<br>TCTGAATTCTCAGGGTCCCGTCGGGGATG |
| U6       | CTCGCTTCGGCAGCACA<br>AACGCTTCACGAATTTGCGT                       |
| Bcl-2    | GTTCGGTGGGGTCATGTGTGTGGAGAGCG<br>TAGCTGATTCGACGTTTTGCCTGA       |
| Caspase3 | CAGTGGAGGCCGACTTCTTG<br>ATGAACCAGGAGCCATCCTTT                   |
| MMP-7    | GGCGGCACCACCATGTACCCT<br>AGGGGCCGGACTCGTCATACT                  |
| MMP-2    | TTGATGGCATCGCTCAGATC<br>TTGTCACGTGGCGTCACAGT                    |
| GAPDH    | CGTCTTCACCACCATGGAGA<br>CGGCCATCACGCCACAGCTT                    |

Notes: RT-qPCR, reverse transcription quantitative polymerase chain reaction; F, forward; R, reverse.
